# Supplementary material for: Elevated expression of IFN-inducible CXCR3 ligands predicts poor prognosis in patients with non-metastatic clear-cell renal cell carcinoma
Source: PubMed Central journal article supplement (PMC4924692; doi:10.18632/oncotarget.7468), 2016-02-17
Supplement: oncotarget-07-13976-s001.pdf [file oncotarget-07-13976-s001.pdf]

# Elevated expression of IFN-inducible CXCR3 ligands predicts poor prognosis in patients with non-metastatic clear-cell renal cell carcinoma

## Supplementary Materials

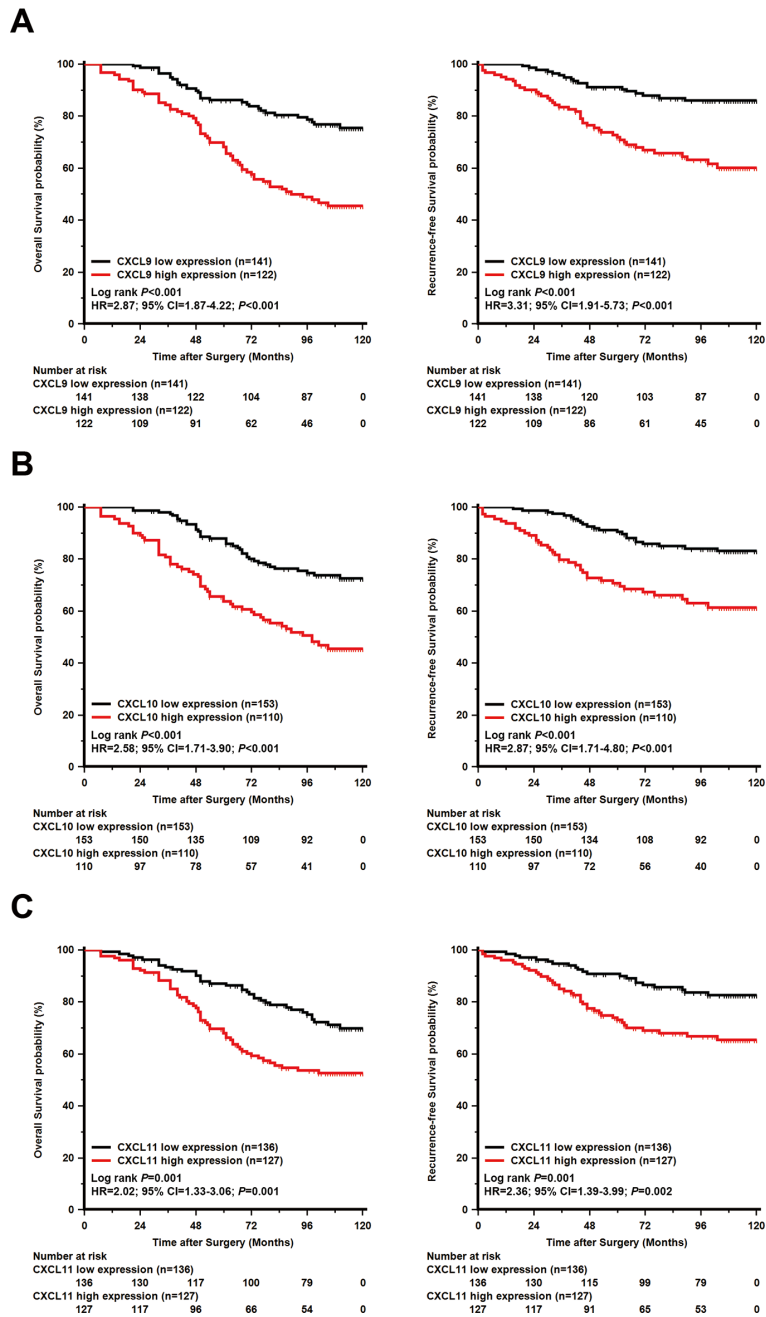

**Supplementary Figure S1: Association of CXCL9, CXCL10 and CXCL11 expression with OS and RFS in non-metastatic ccRCC patients.** (A) Kaplan-Meier analysis of OS and RFS dichotomized by CXCL9 expression. (B) Kaplan-Meier analysis of OS and RFS dichotomized by CXCL10 expression. (C) Kaplan-Meier analysis of OS and RFS dichotomized by CXCL11 expression.

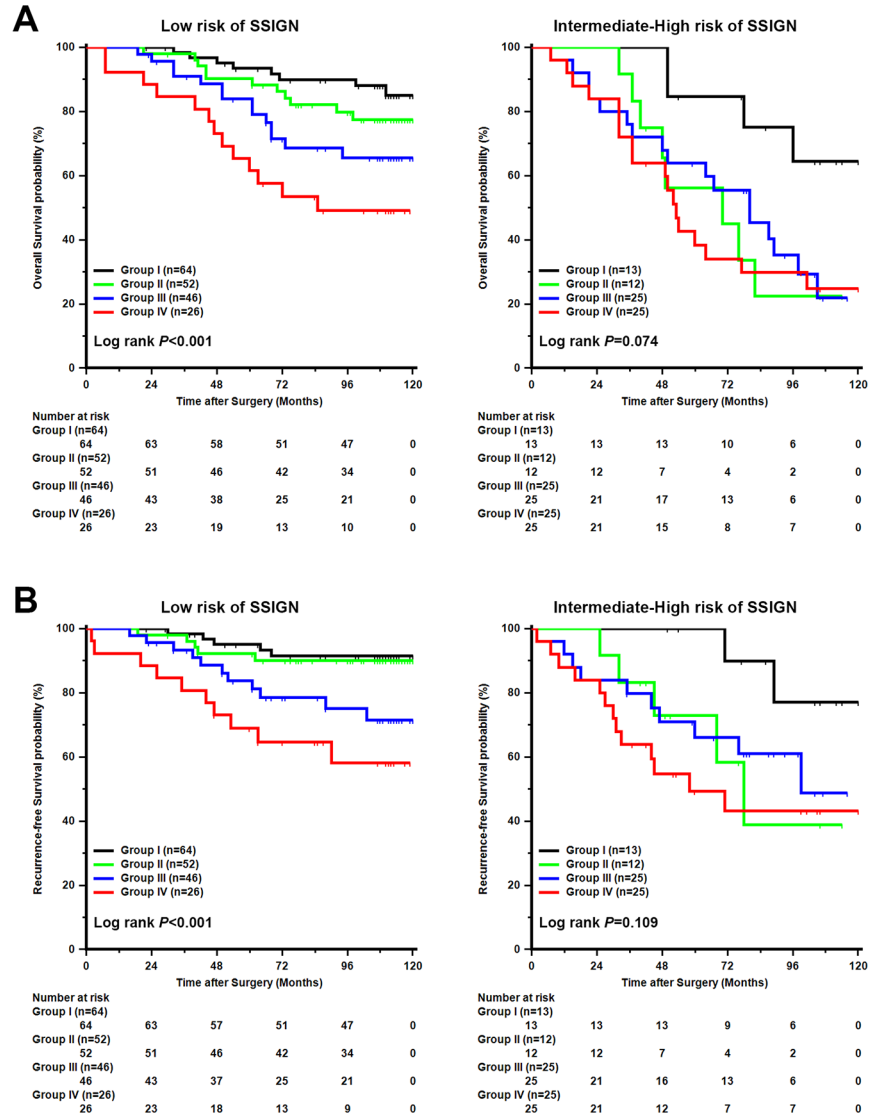

**Supplementary Figure S2: Association of ICL score with OS and RFS in different subgroups of SSIGN in non-metastatic ccRCC patients.** (A) Kaplan-Meier analysis of OS stratified by ICL score in different risk subgroups of SSIGN. (B) Kaplan-Meier analysis of RFS stratified by ICL score in different risk subgroups of SSIGN.

**Supplementary Table S1: Associations of patient characteristics with expression of CXCL9, CXCL10 and CXCL11**

|                  | CXCL9                 |                        |          | CXCL10                |                        |          | CXCL11                |                        |          |
|------------------|-----------------------|------------------------|----------|-----------------------|------------------------|----------|-----------------------|------------------------|----------|
|                  | Low<br><i>n</i> = 141 | High<br><i>n</i> = 122 | <i>p</i> | Low<br><i>n</i> = 153 | High<br><i>n</i> = 110 | <i>p</i> | Low<br><i>n</i> = 136 | High<br><i>n</i> = 127 | <i>p</i> |
| Age (years)†     |                       |                        | 0.353    |                       |                        | 0.360    |                       |                        | 0.466    |
| Mean             | 56.2                  | 57.3                   |          | 57.4                  | 55.7                   |          | 56.4                  | 57.1                   |          |
| Median           | 54                    | 57                     |          | 56                    | 55                     |          | 54                    | 56                     |          |
| IQR              | 49–63                 | 48–68                  |          | 50–66                 | 45–67                  |          | 47–67                 | 50–66                  |          |
| Gender           |                       |                        | 0.969    |                       |                        | 0.901    |                       |                        | 0.527    |
| Male             | 99                    | 85                     |          | 107                   | 77                     |          | 98                    | 86                     |          |
| Female           | 42                    | 37                     |          | 46                    | 33                     |          | 38                    | 41                     |          |
| Tumor size (cm)† |                       |                        | 0.078    |                       |                        | 0.023*   |                       |                        | 0.211    |
| Mean             | 4.3                   | 4.9                    |          | 4.3                   | 5.1                    |          | 4.4                   | 4.8                    |          |
| Median           | 4                     | 4                      |          | 4                     | 4.5                    |          | 3.8                   | 4.5                    |          |
| IQR              | 2.8–5.5               | 3–6                    |          | 3–5.5                 | 3–6.5                  |          | 3–5.5                 | 3–6                    |          |
| pT stage         |                       |                        | 0.381    |                       |                        | 0.035*   |                       |                        | 0.251    |
| pT1              | 95                    | 74                     |          | 107                   | 62                     |          | 93                    | 76                     |          |
| pT2              | 18                    | 15                     |          | 19                    | 14                     |          | 17                    | 16                     |          |
| pT3              | 28                    | 33                     |          | 27                    | 34                     |          | 26                    | 35                     |          |
| Fuhrman grade    |                       |                        | < 0.001* |                       |                        | < 0.001* |                       |                        | 0.581    |
| 1                | 34                    | 12                     |          | 38                    | 8                      |          | 24                    | 22                     |          |
| 2                | 67                    | 49                     |          | 67                    | 49                     |          | 65                    | 51                     |          |
| 3                | 30                    | 37                     |          | 37                    | 30                     |          | 31                    | 36                     |          |
| 4                | 10                    | 24                     |          | 11                    | 23                     |          | 16                    | 18                     |          |
| Necrosis         |                       |                        | 0.127    |                       |                        | 0.018*   |                       |                        | 0.760    |
| Absent           | 114                   | 88                     |          | 126                   | 76                     |          | 106                   | 96                     |          |
| Present          | 27                    | 34                     |          | 27                    | 34                     |          | 30                    | 31                     |          |
| ECOG-PS          |                       |                        | 0.905    |                       |                        | 0.993    |                       |                        | 0.628    |
| 0                | 122                   | 104                    |          | 132                   | 94                     |          | 115                   | 111                    |          |
| ≥ 1              | 19                    | 18                     |          | 21                    | 16                     |          | 21                    | 16                     |          |
| MVI              |                       |                        | 0.922    |                       |                        | 0.904    |                       |                        | 0.877    |
| Absent           | 108                   | 95                     |          | 118                   | 85                     |          | 106                   | 97                     |          |
| Present          | 33                    | 27                     |          | 35                    | 25                     |          | 30                    | 30                     |          |
| SSIGN            |                       |                        | < 0.001* |                       |                        | < 0.001* |                       |                        | 0.096    |
| 0–3              | 115                   | 73                     |          | 125                   | 63                     |          | 102                   | 86                     |          |
| 4–7              | 25                    | 43                     |          | 27                    | 41                     |          | 33                    | 35                     |          |
| ≥ 8              | 1                     | 6                      |          | 1                     | 6                      |          | 1                     | 6                      |          |

IQR, Interquartile range; MVI, Microvascular invasion; ECOG-PS, Eastern Cooperative Oncology Group performance status; SSIGN, the Mayo Clinic stage, size, grade, and necrosis score.

†The results were calculated by Kruskal-Wallis test.

\**P* < 0.05 is considered statistically significant.
